# Supplementary material for: Sustainable synthesis of ambrisentan – syringic acid cocrystal: employing mechanochemistry in the development of novel pharmaceutical solid form
Source: Royal Society of Chemistry journal article supplement (doi:10.1039/c9ce01818b), 2020-01-01
Supplement: c9ce01818b1.pdf [file c9ce01818b1.pdf]

## **Supplementary Information**

### **Sustainable synthesis of ambrisentan - syringic acid cocrystal: Employing mechanochemistry in the development of novel pharmaceutical solid form**

**Jamshed Haneef<sup>a,b</sup>, Renu Chadha<sup>b\*</sup>**

<sup>a</sup>Department of Pharmaceutical Chemistry, School of Pharmaceutical Education and Research, Jamia Hamdard, New Delhi 110 062, India

<sup>b</sup>University Institute of Pharmaceutical Sciences, UGC-Centre of Advanced Studies (CAS), Panjab University, Chandigarh 160 014, India

Table 1: Multicomponent solid form screening of ambrisentan using various phenolic acid coformers

Figure 1: Overlay of FTIR spectra of AMT, SA and AMT-SA

Figure 2: Overlay of PXRD patterns of cocrystal (AMT-SA) before and after solubility study

**Table 1:** Multicomponent solid form screening of ambrisentan using various phenolic acid coformers

| S. No. | Name of Coformers          | Experiment outcomes |
|--------|----------------------------|---------------------|
| 1.     | Gallic acid                | Physical mixture    |
| 2.     | Syringic acid              | <b>Cocrystal</b>    |
| 3.     | Salicylic acid             | Physical mixture    |
| 4.     | Gentisic acid              | Physical mixture    |
| 5.     | 4- hydroxy benzoic acid    | Physical mixture    |
| 6.     | 2,3-dihydroxy benzoic acid | Physical mixture    |
| 7.     | 3,4-dihydroxy benzoic acid | Physical mixture    |
| 8.     | 2,4-dihydroxy benzoic acid | Physical mixture    |
| 9.     | 3,5-dihydroxy benzoic acid | Physical mixture    |

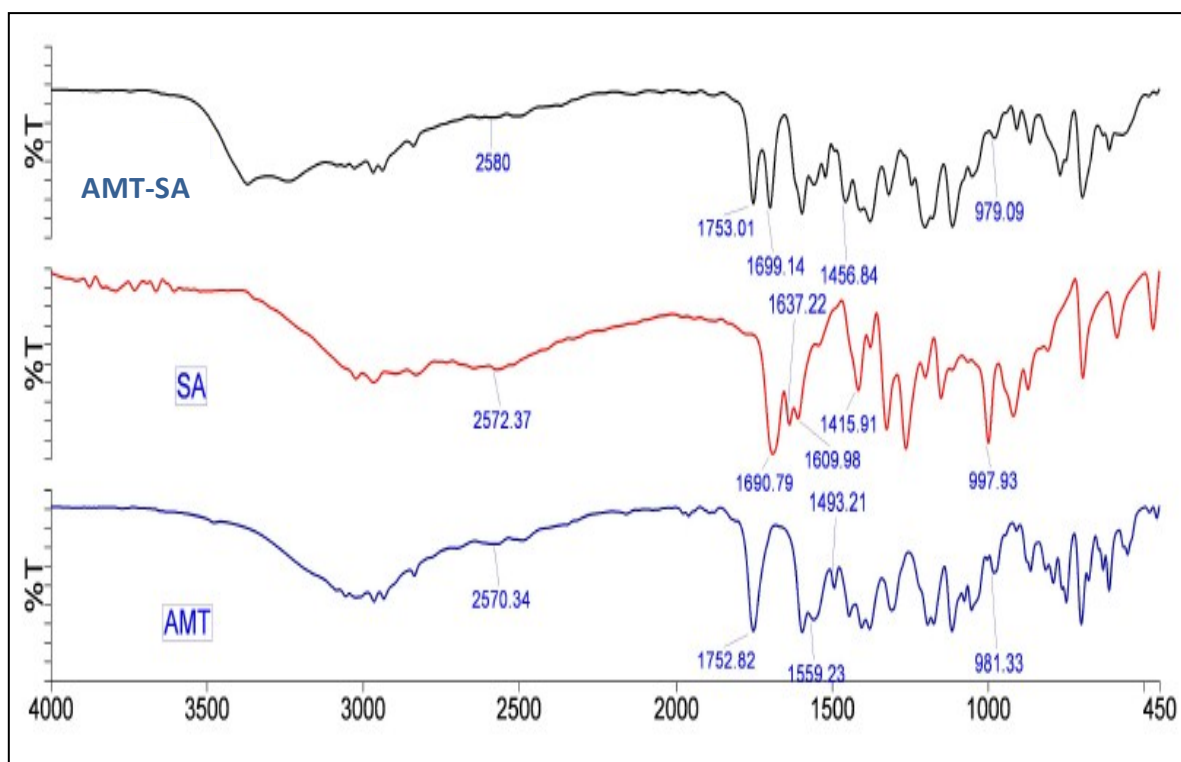

Figure 1: Overlay of FTIR spectra of AMT, SA and AMT-SA

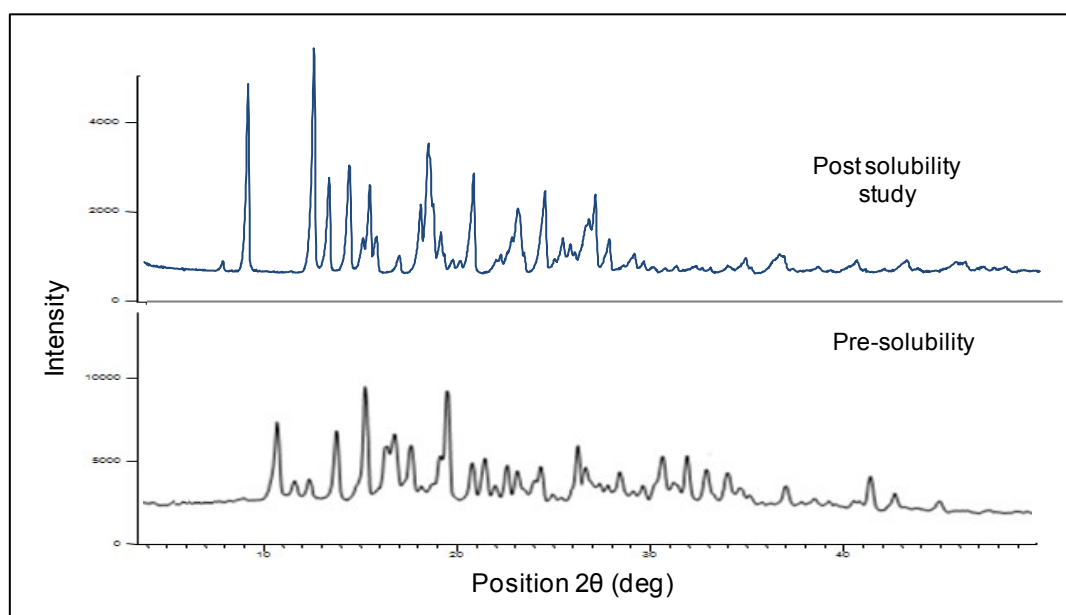

Figure 2: Overlay of PXRD patterns of cocrystal (AMT-SA) before and after solubility study
